# Supplementary material for: Development of landscape conservation value map of Jeju island, Korea for integrative landscape management and planning using conservation value of landscape typology
Source: PeerJ journal article supplement (doi:10.7717/peerj.11449), 2021-06-01
Supplement: 1st_Survey.pdf [file 1st_Survey.pdf]

# **1<sup>st</sup> Expert Survey on Landscape Conservation Value**

## **1<sup>st</sup> Survey**

Prior to evaluating landscape conservation value of the combination of landform and land cover, We would like to ask you to give an appropriate value to each type of landform and land cover based on 6 factors (Representativeness, specificity, diversity, rarity, irreproducibility and educational value) with your expert knowledge and experience. The values are to be given separately in order to prevent bias and confusion when conducting 2<sup>nd</sup> Survey (Rating combinations of landform and land cover types).

■ Landform

|   |        |        |          |       |            |           |         |
|---|--------|--------|----------|-------|------------|-----------|---------|
| 1 | Summit | Summit | Shoulder | Slope | Mild Slope | Flat land | Channel |
|---|--------|--------|----------|-------|------------|-----------|---------|

Landscape Conservation Value of Summit

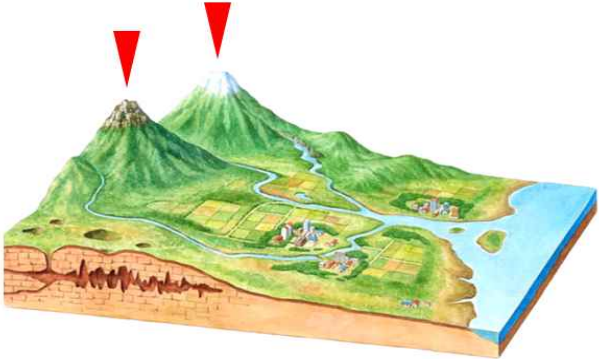

Flat land appearing at the top of the mountain limits the inflow and outflow of energy and materials from the surrounding area.

|          |     |        |      |           |
|----------|-----|--------|------|-----------|
| Very Low | Low | Normal | High | Very High |
| ①        | ②   | ③      | ④    | ⑤         |

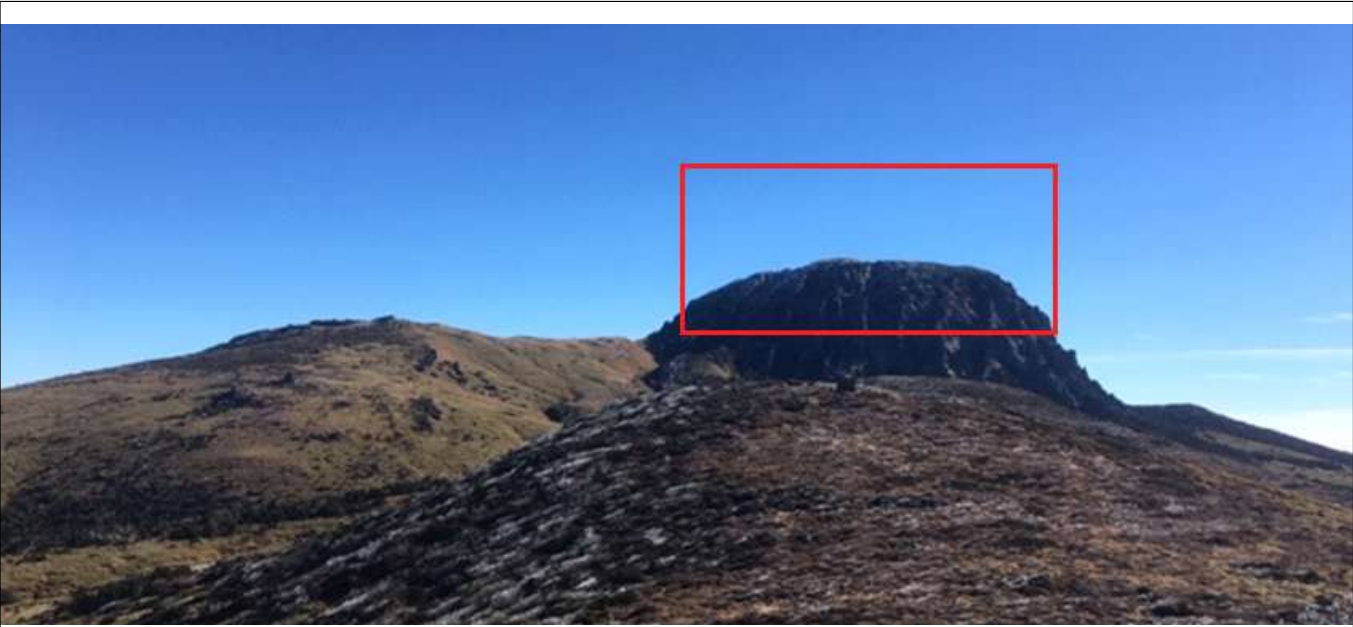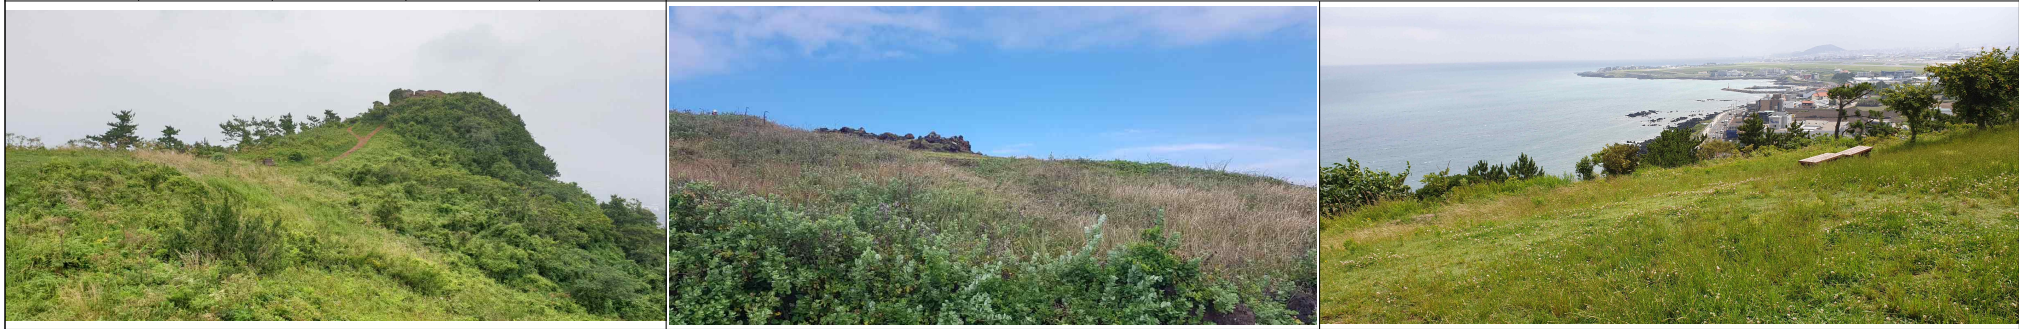



Landscape Conservation Value of Shoulder

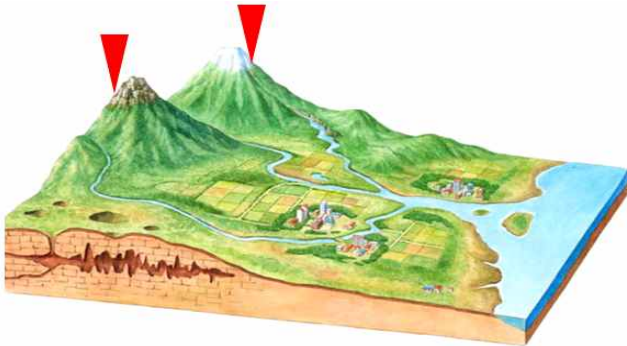

The vertical flow of water is replaced by horizontal flow as the slope increases and the flow of water inside the soil.

| Very Low | Low | Normal | High | Very High |
|----------|-----|--------|------|-----------|
| ①        | ②   | ③      | ④    | ⑤         |

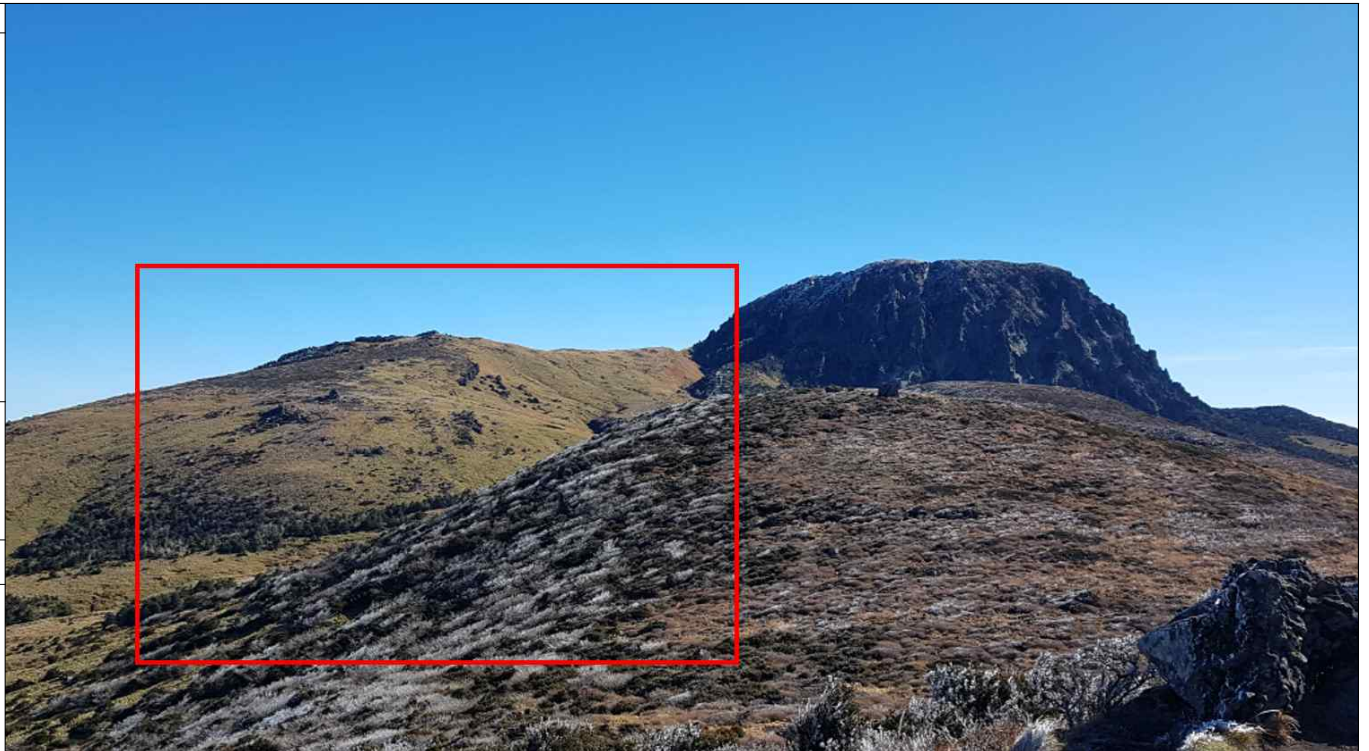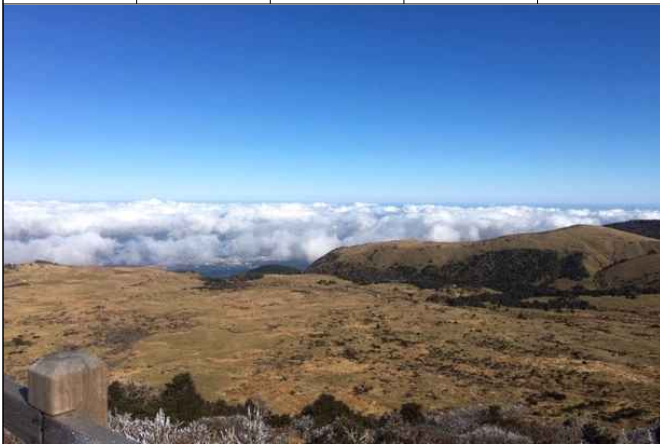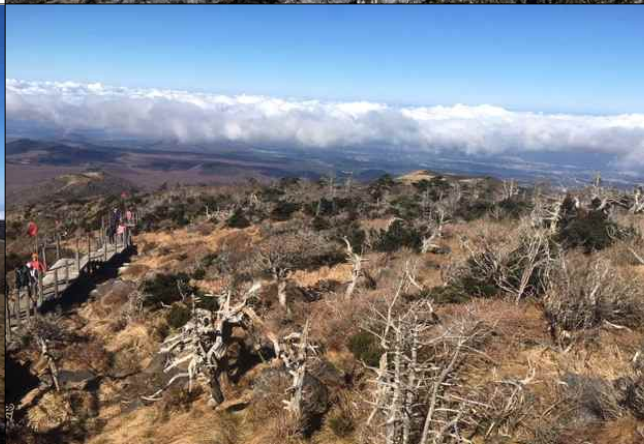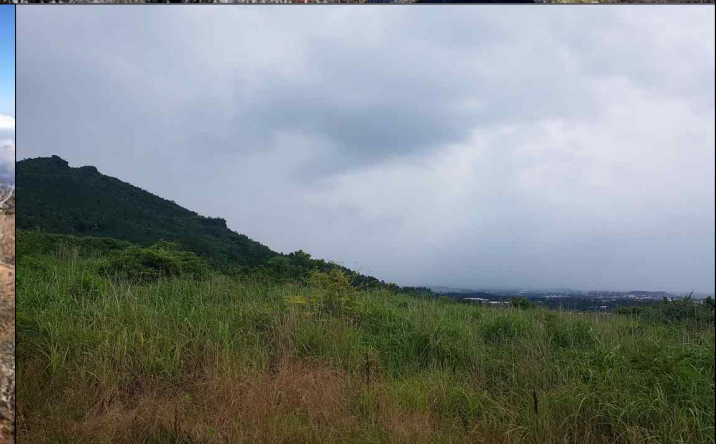



### Landscape Conservation Value of Slope

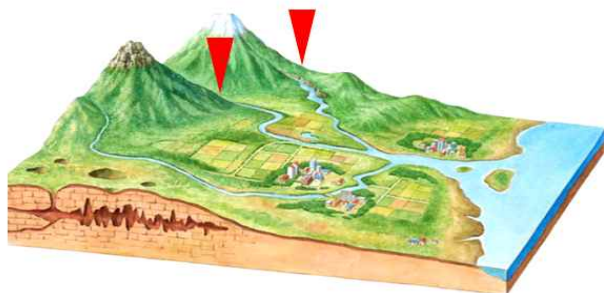

The midpoint of the upper slope, where the outflow of material prevails, and the inflow of material prevails, include major erosion, slide, creep, and movement of material within the soil layer.

| Very Low | Low | Normal | High | Very High |
|----------|-----|--------|------|-----------|
| ①        | ②   | ③      | ④    | ⑤         |

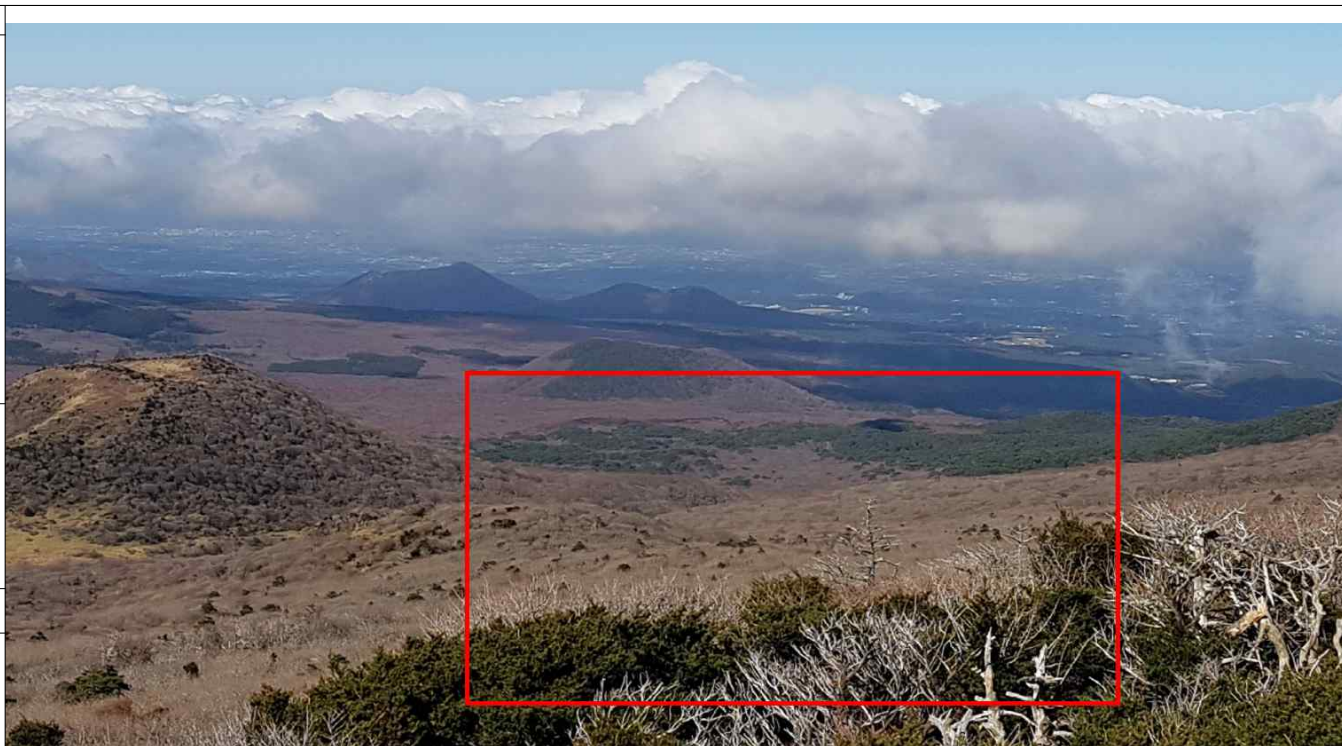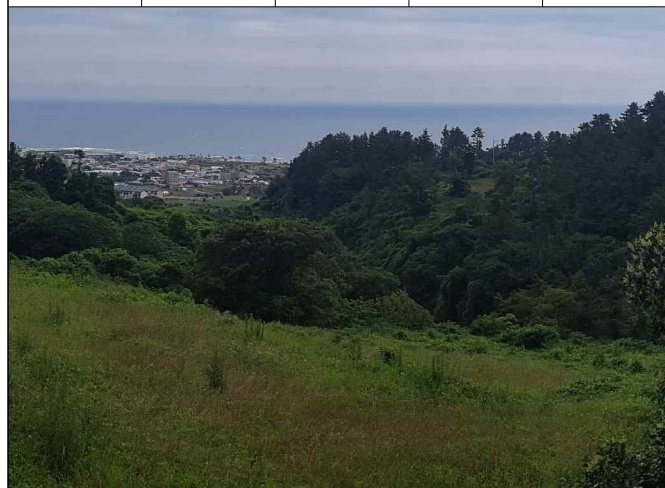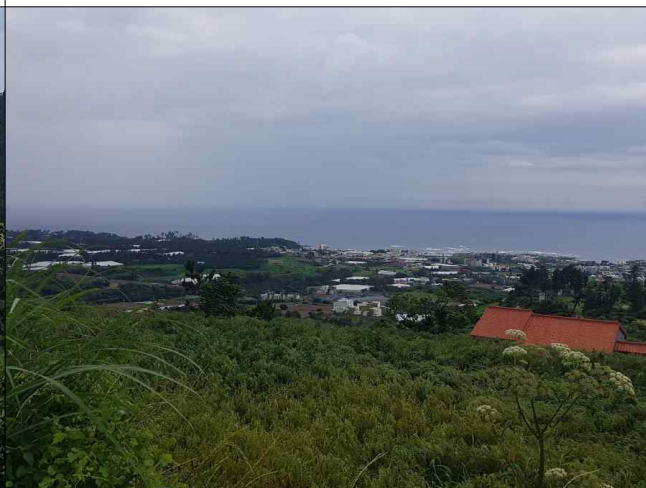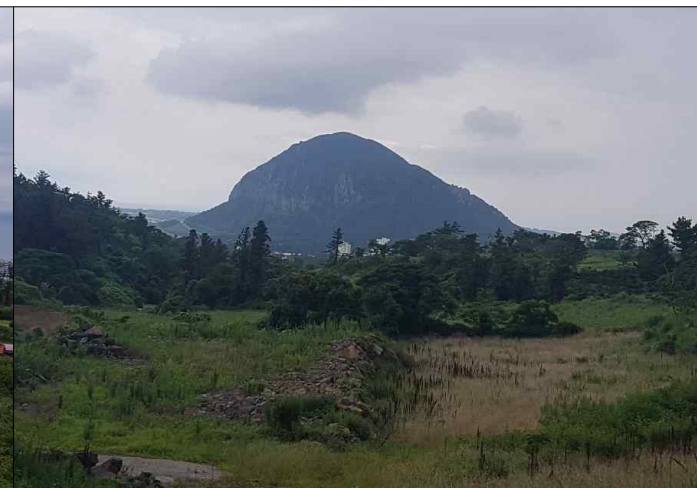



#### Landscape Conservation Value of Mild slope

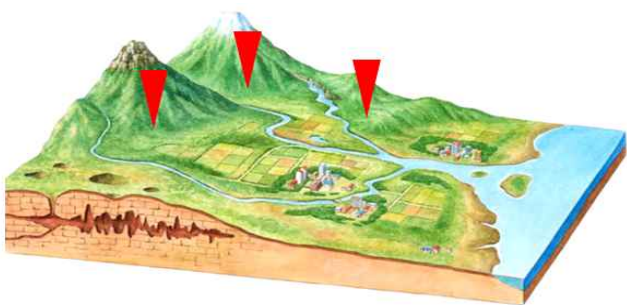

It shows the accumulation of substances from the upper soil topsoil topography surface and can observe distinct sediment layers as a result of long-term slope development.

| Very Low | Low | Normal | High | Very High |
|----------|-----|--------|------|-----------|
| ①        | ②   | ③      | ④    | ⑤         |

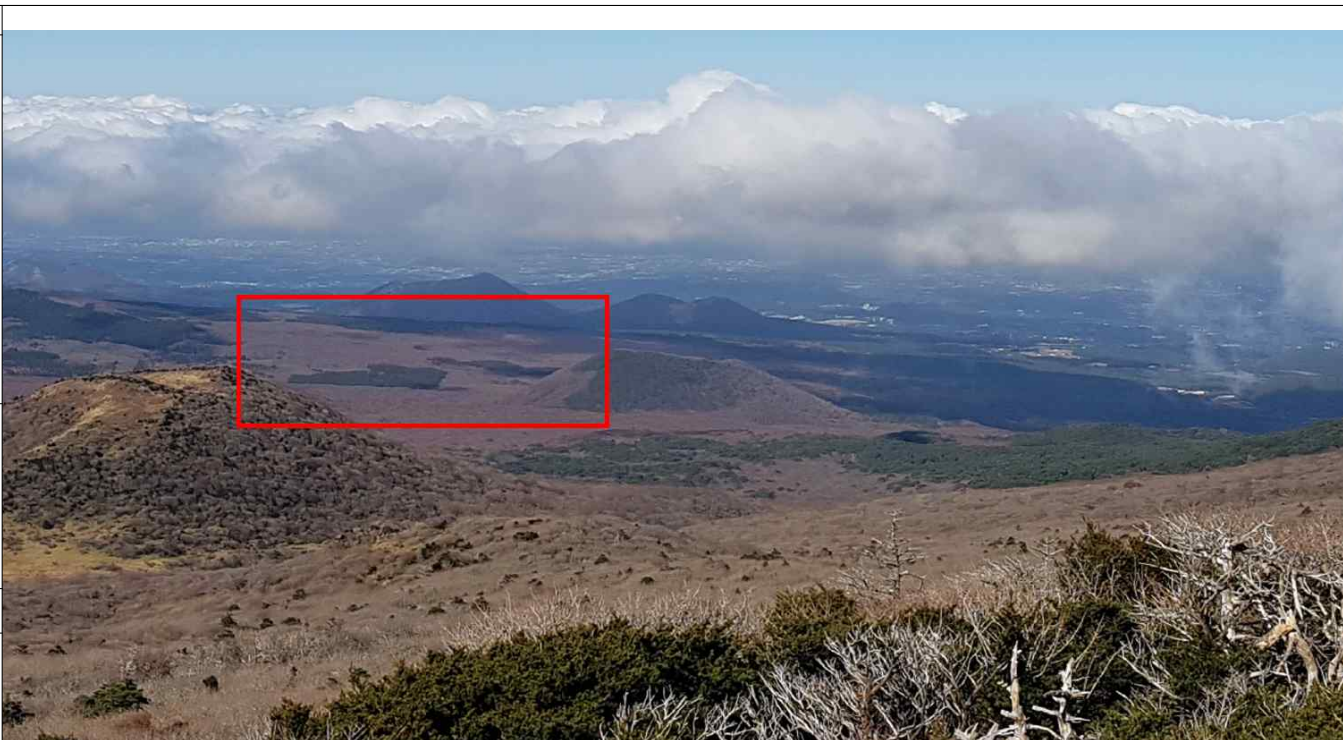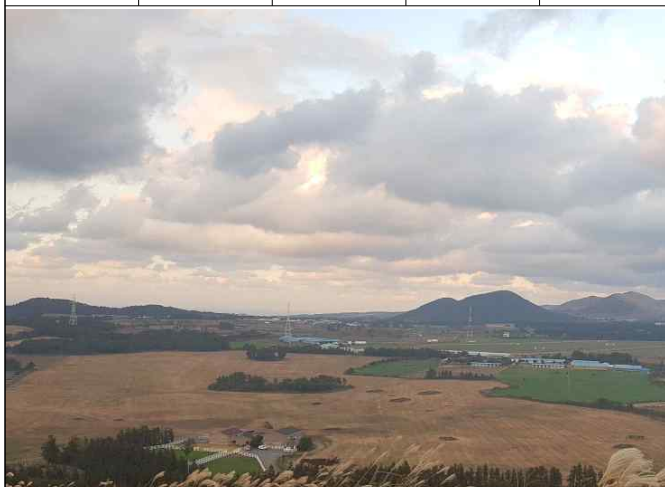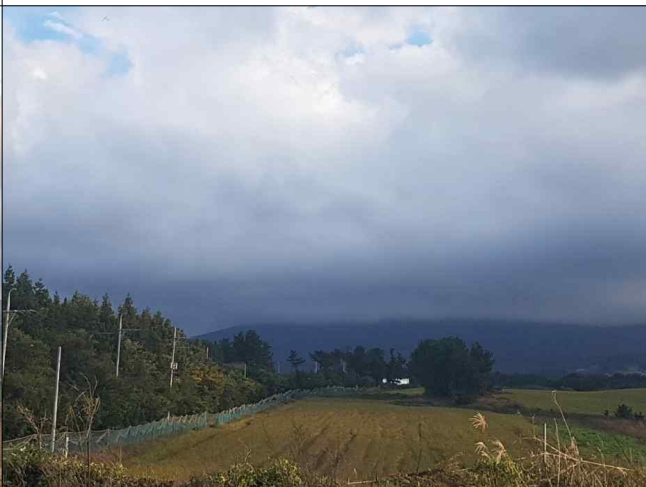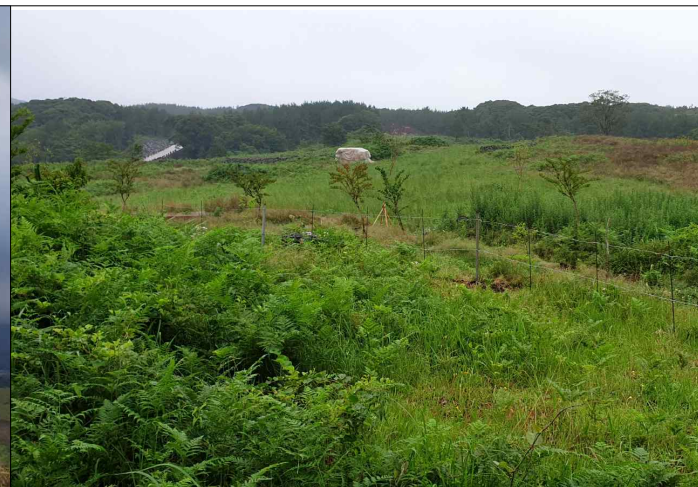



|             |        |          |       |            |           |         |
|-------------|--------|----------|-------|------------|-----------|---------|
| 5 Flat land | Summit | Shoulder | Slope | Mild Slope | Flat land | Channel |
|-------------|--------|----------|-------|------------|-----------|---------|

### Landscape Conservation Value of Flatland

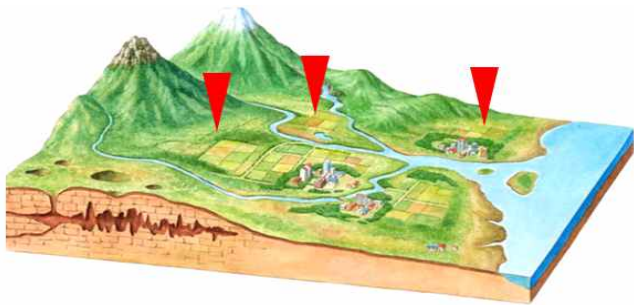

It is a topographical surface formed by the accumulation of moving materials along the stream.

| Very Low | Low | Normal | High | Very High |
|----------|-----|--------|------|-----------|
| ①        | ②   | ③      | ④    | ⑤         |

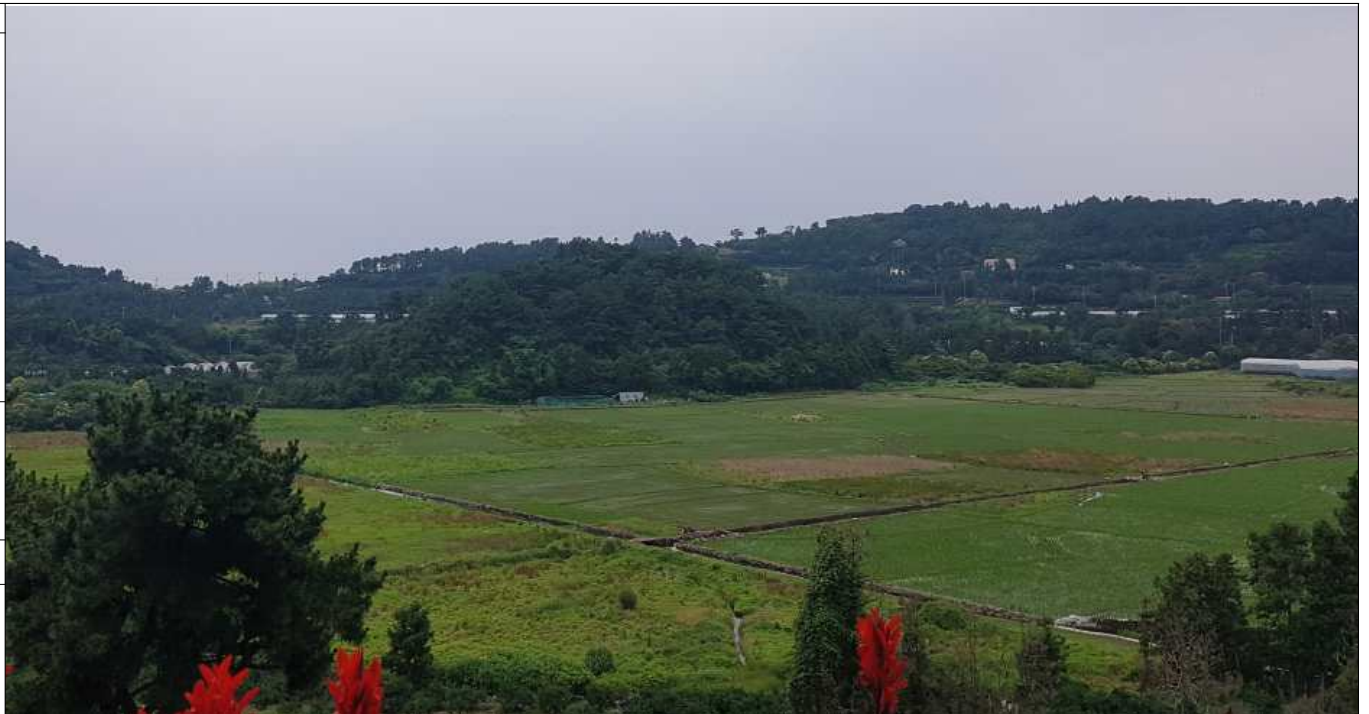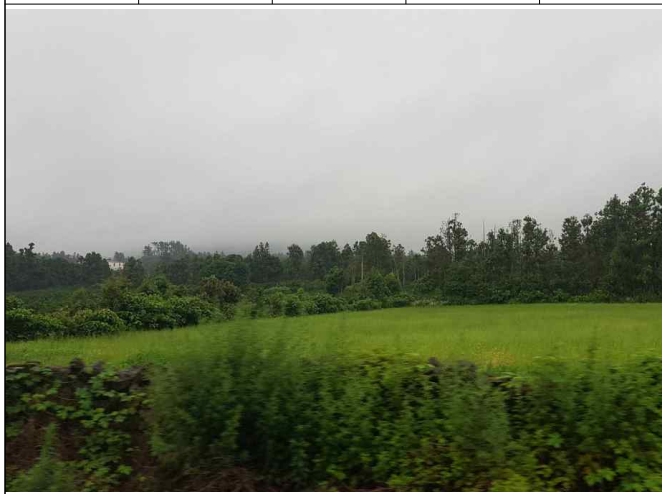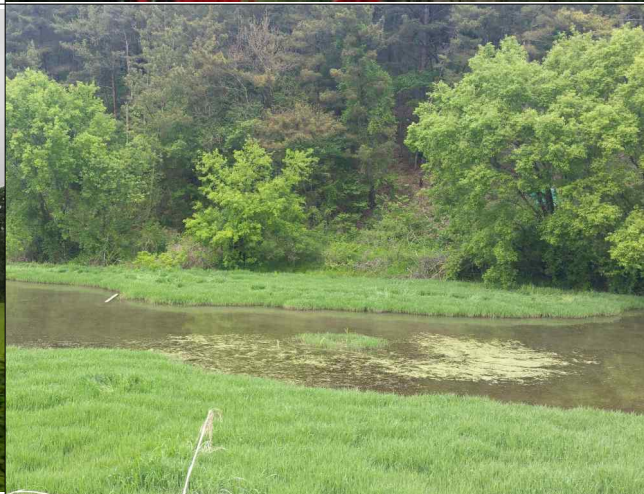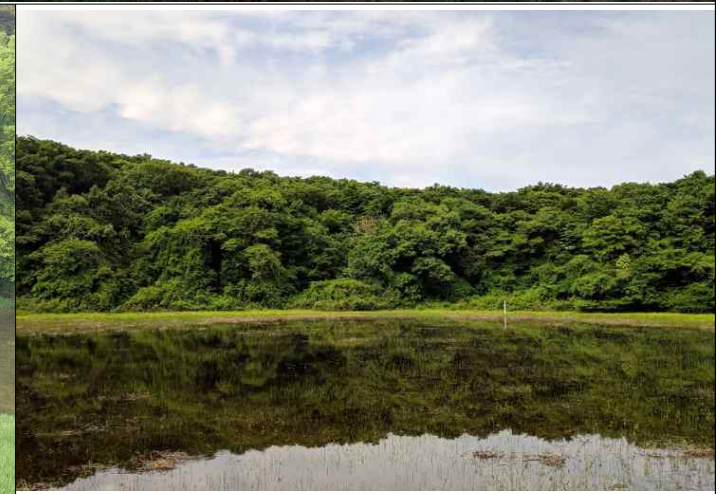



### Landscape Conservation Value of Channel

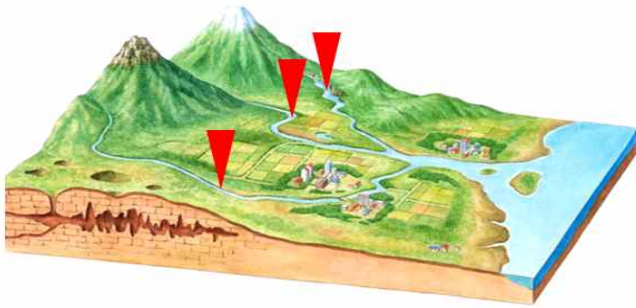

The erosion and deposition of matter by water flow. The flow of water is always present in the case of high-order streams, and the flow of water is intermittent in the case of low-order streams or a river.

| Very Low | Low | Normal | High | Very High |
|----------|-----|--------|------|-----------|
| ①        | ②   | ③      | ④    | ⑤         |

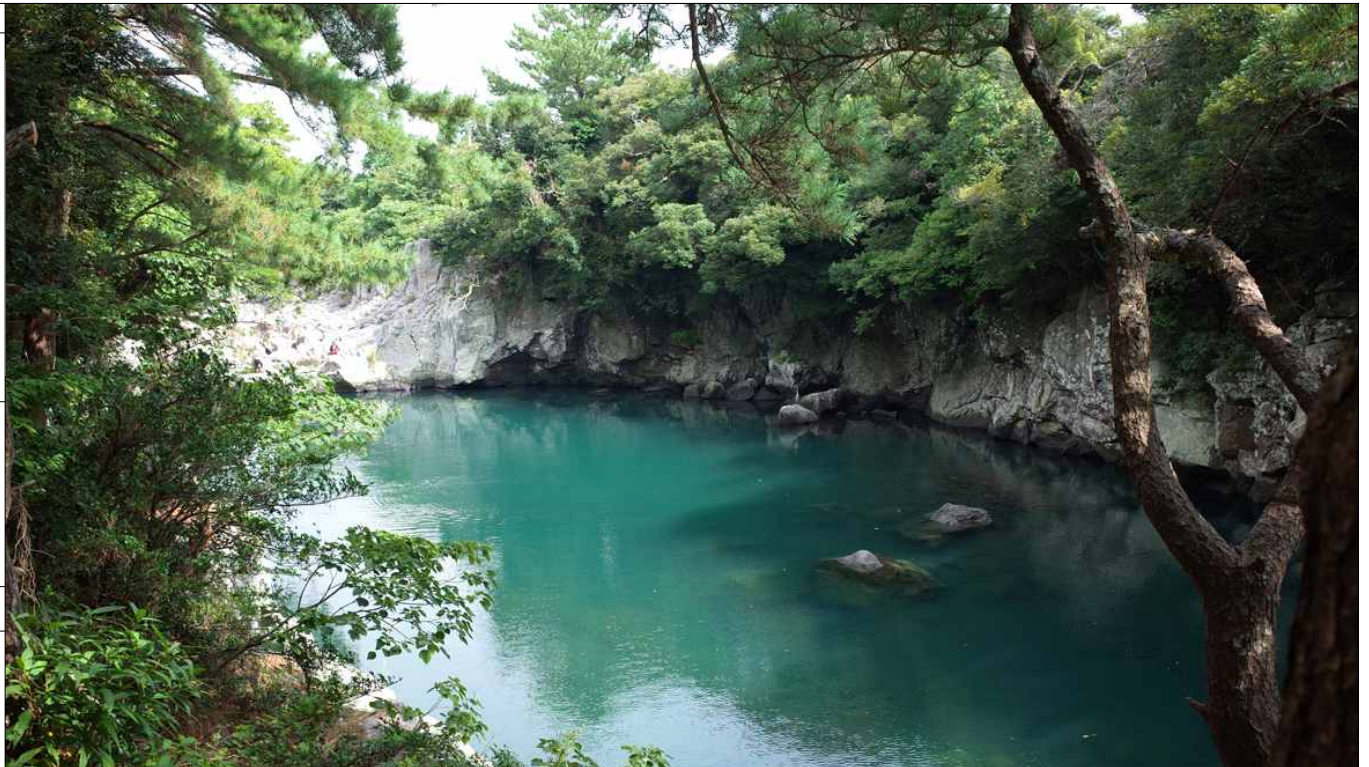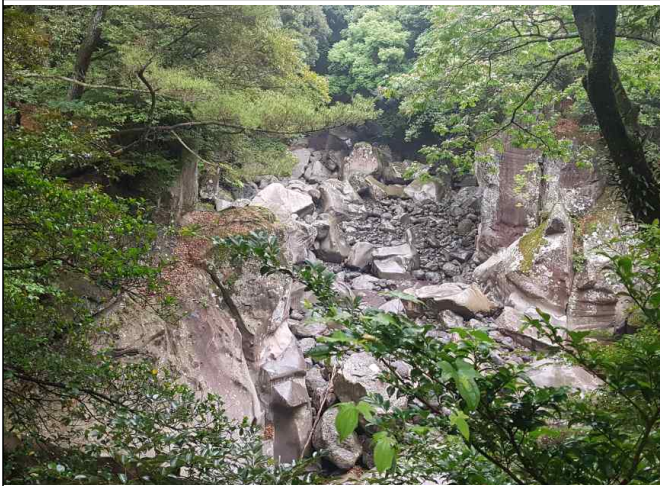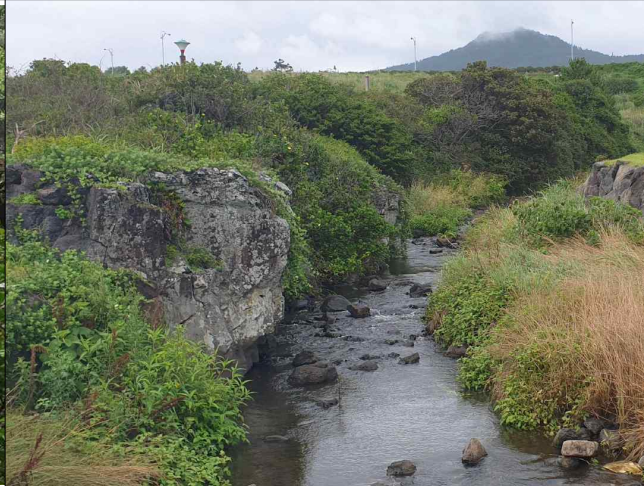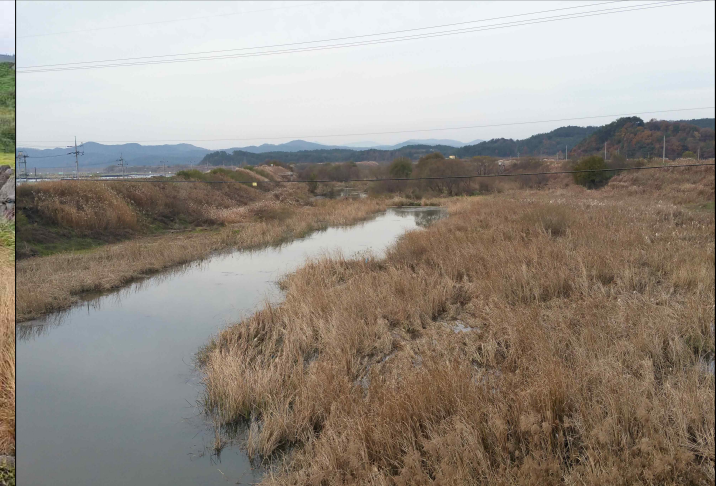



## ■ Land Cover

|                  |                |                   |        |           |         |             |            |
|------------------|----------------|-------------------|--------|-----------|---------|-------------|------------|
| 1 Developed Land | Developed Land | Agricultural Land | Forest | Grassland | Wetland | Barren land | Open water |
|------------------|----------------|-------------------|--------|-----------|---------|-------------|------------|

| Landscape Conservation Value of Developed land                                                              |     |        |      |           |
|-------------------------------------------------------------------------------------------------------------|-----|--------|------|-----------|
| Includes structures such as residential, commercial and industrial facilities and transportation facilities |     |        |      |           |
| Very Low                                                                                                    | Low | Normal | High | Very High |
| ①                                                                                                           | ②   | ③      | ④    | ⑤         |

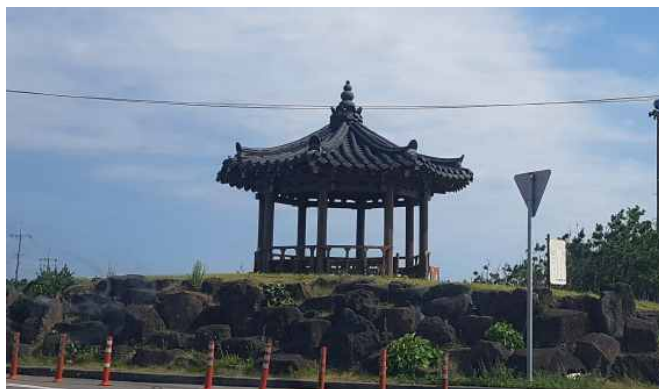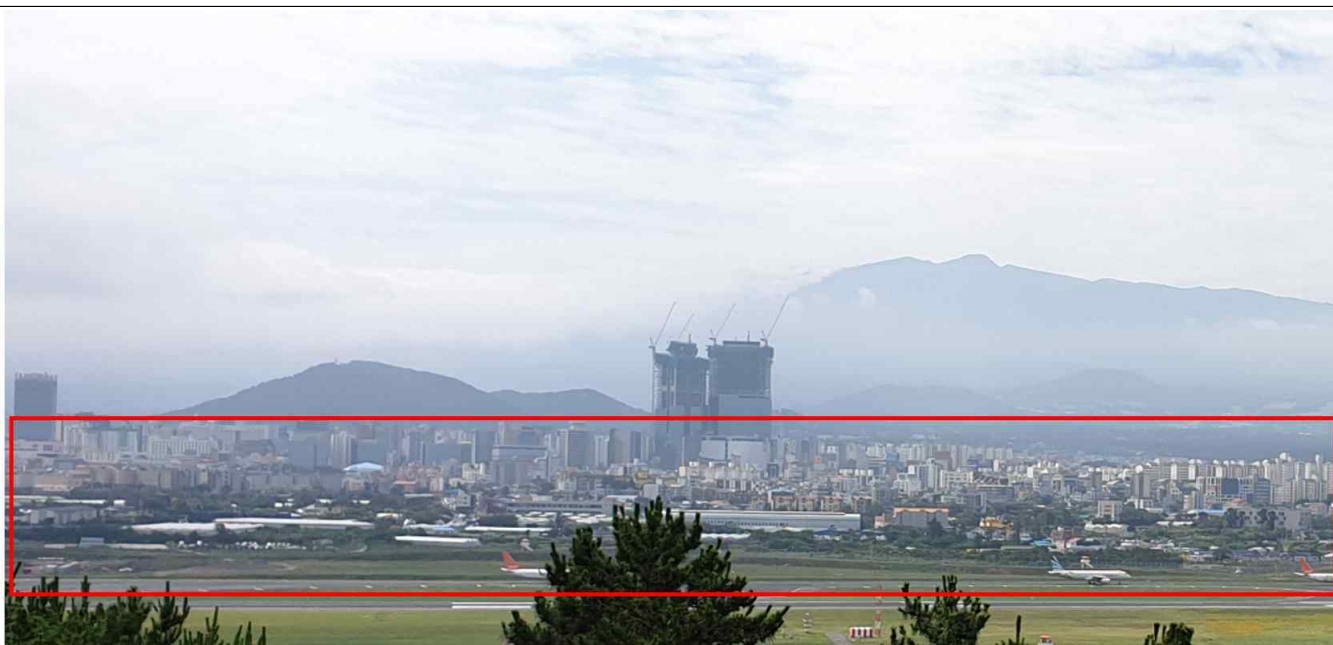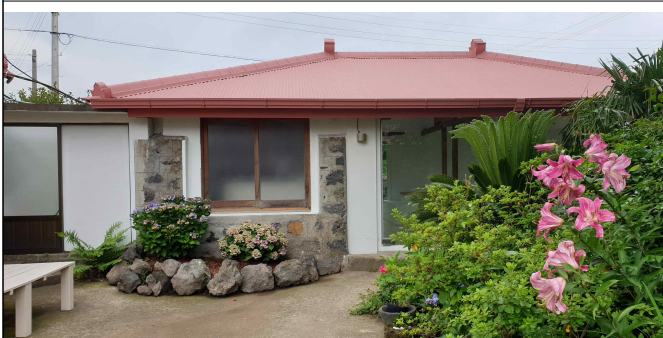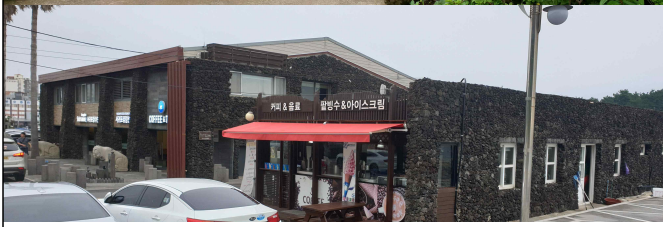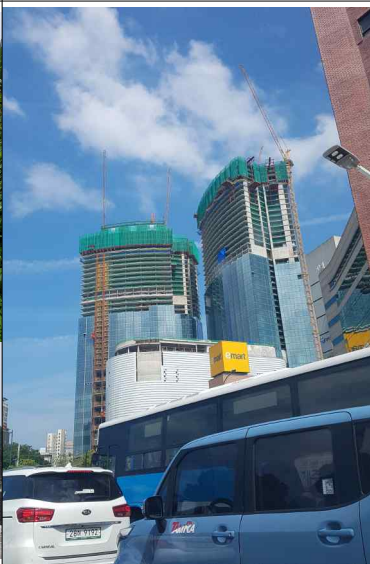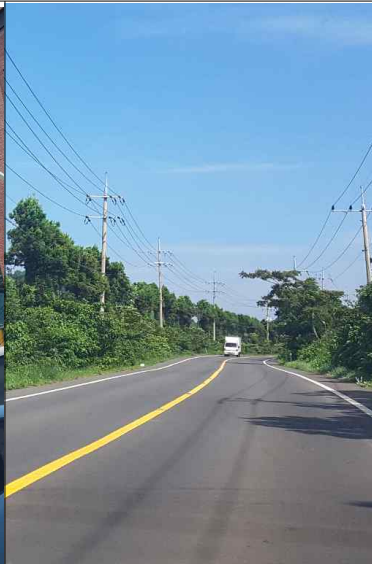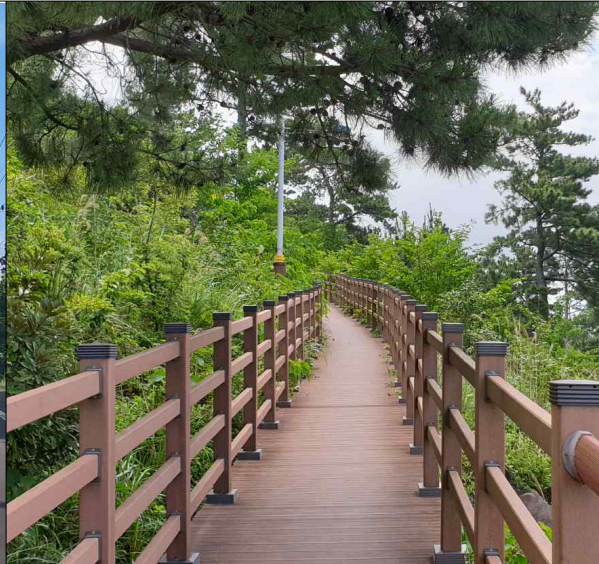



### Landscape Conservation Value of Agricultural land

Agricultural areas where rice paddies and fields are cultivated, and areas where fruit trees, street trees, etc. are cultivated, and facilities used for livestock and dairy farming.

| Very Low | Low | Normal | High | Very High |
|----------|-----|--------|------|-----------|
| ①        | ②   | ③      | ④    | ⑤         |

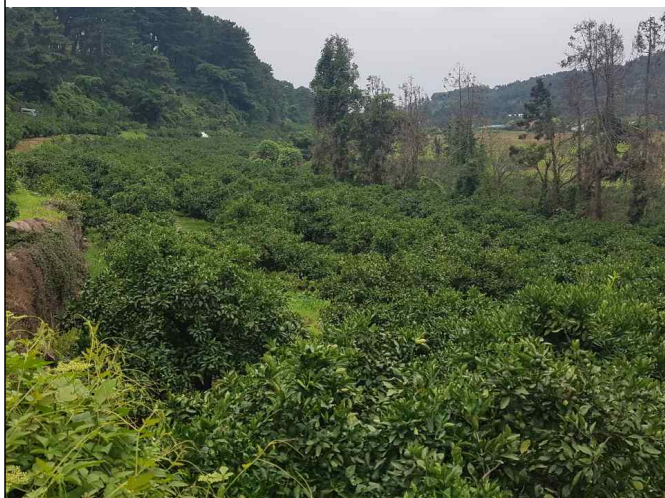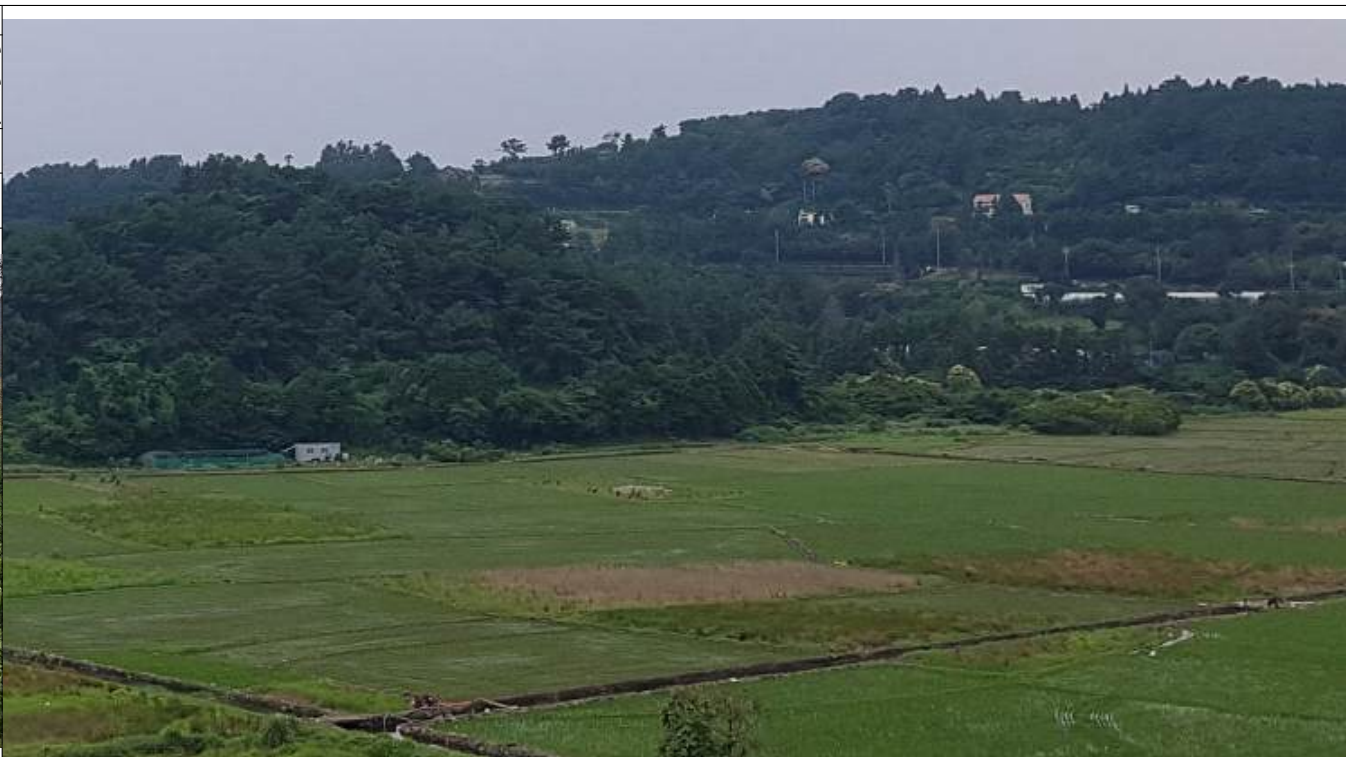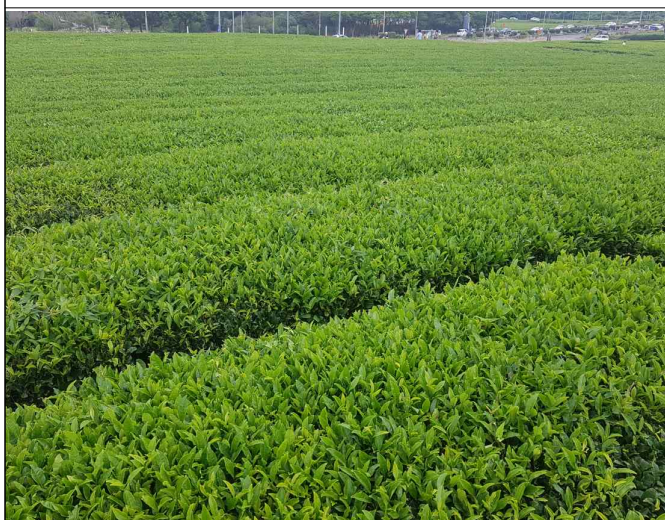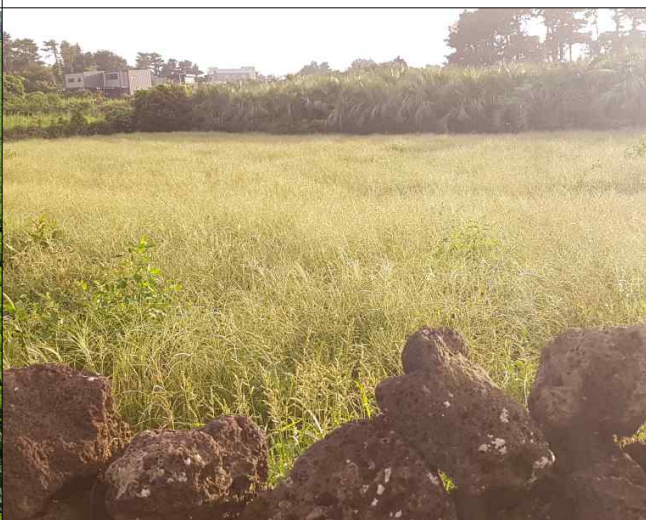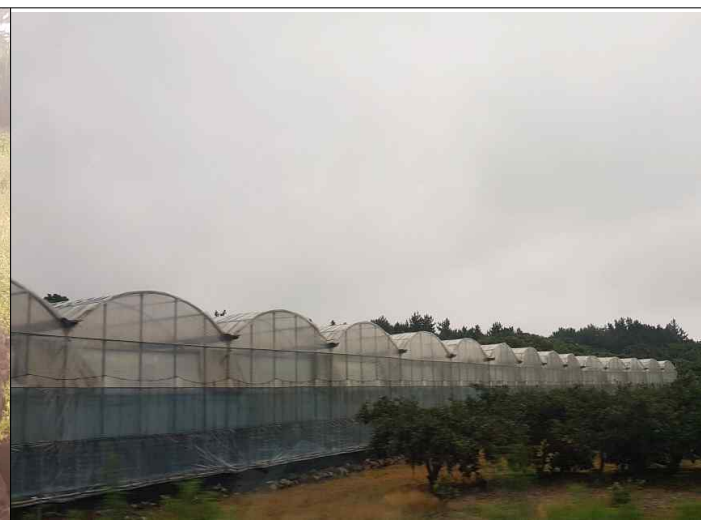



| Landscape Conservation Value of Forest       |     |        |      |           |
|----------------------------------------------|-----|--------|------|-----------|
| A habitat where cluster of trees are growing |     |        |      |           |
| Very Low                                     | Low | Normal | High | Very High |
| ①                                            | ②   | ③      | ④    | ⑤         |

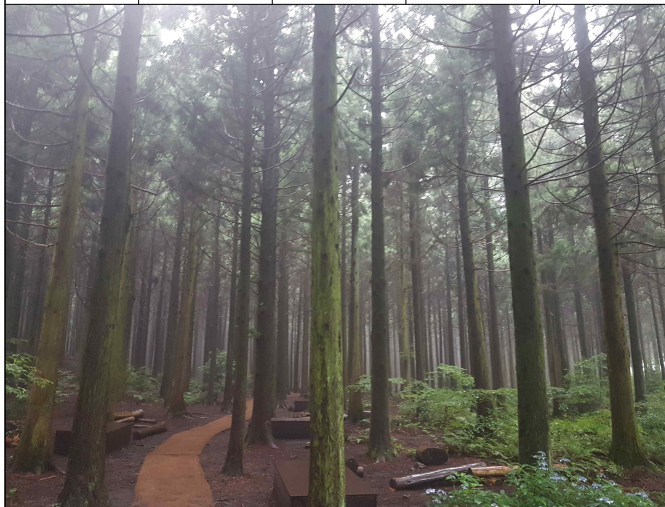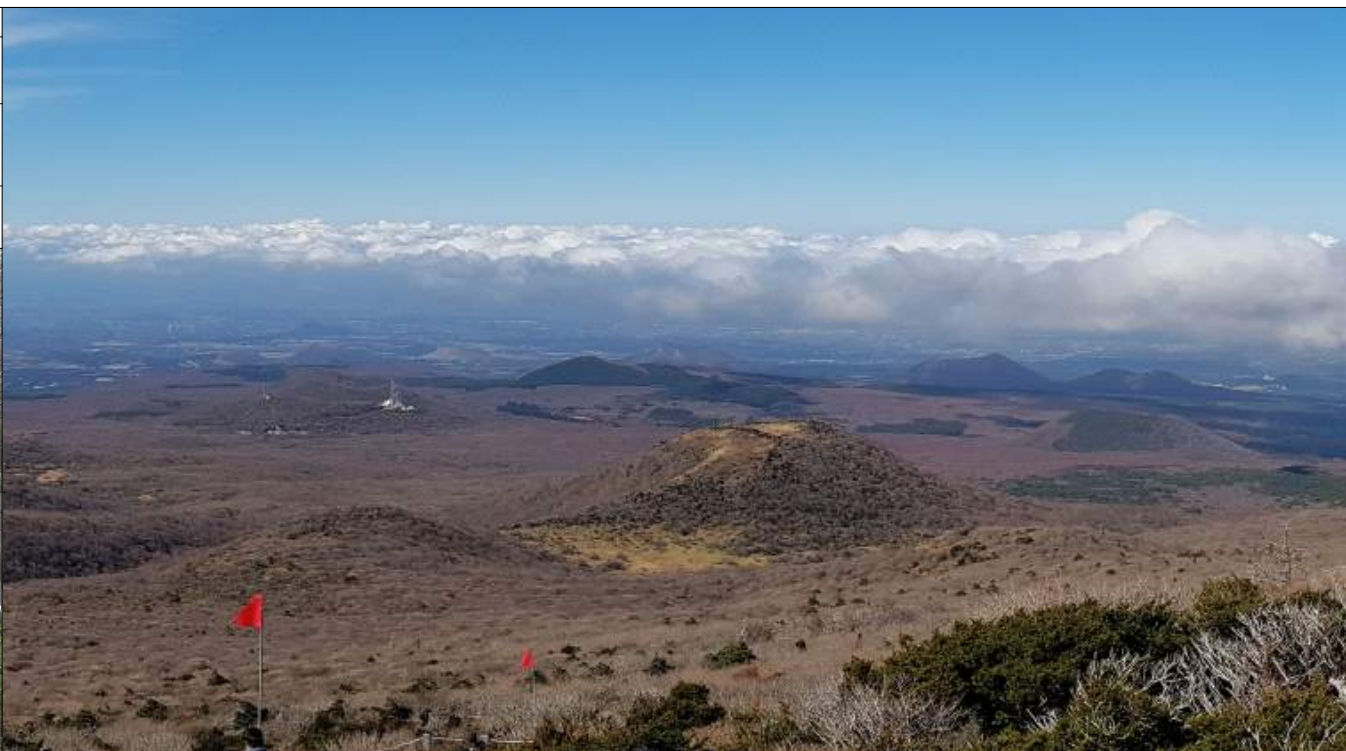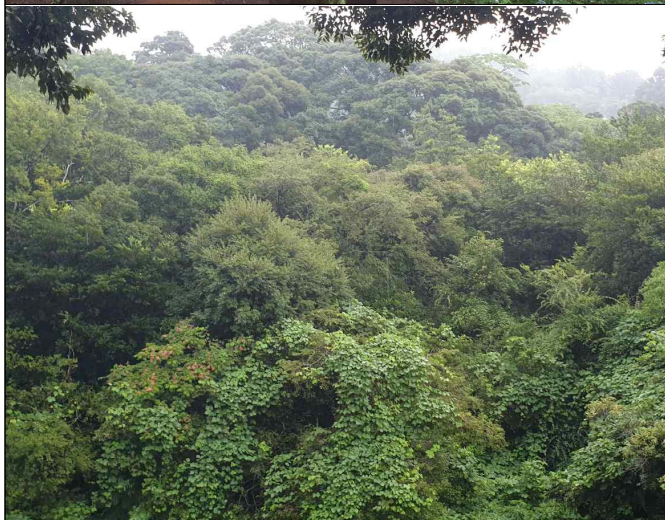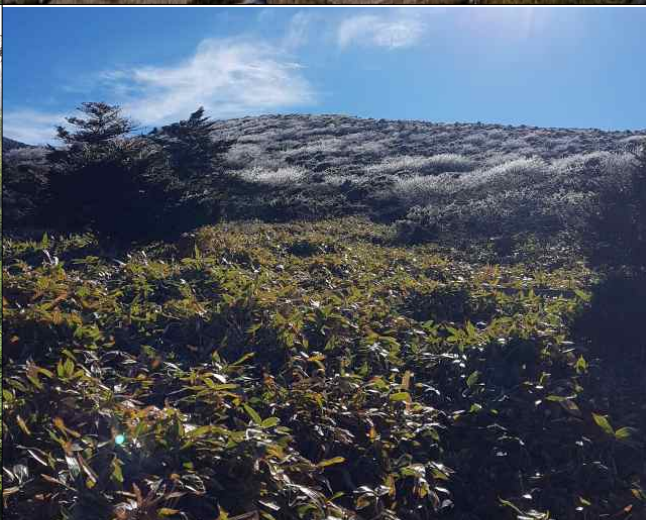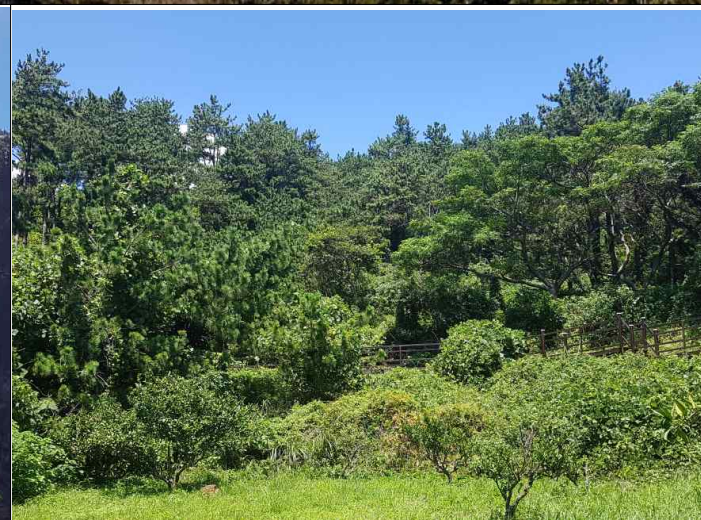



| Landscape Conservation Value of Grassland                                                                                            |                                                                                     |                                                                                      |      |           |  |
|--------------------------------------------------------------------------------------------------------------------------------------|-------------------------------------------------------------------------------------|--------------------------------------------------------------------------------------|------|-----------|------------------------------------------------------------------------------------|
| Land covered with herbaceous plants, including naturally occurring natural grasslands and artificially formed artificial grasslands. |                                                                                     |                                                                                      |      |           |                                                                                    |
| Very Low                                                                                                                             | Low                                                                                 | Normal                                                                               | High | Very High |                                                                                    |
| ①                                                                                                                                    | ②                                                                                   | ③                                                                                    | ④    | ⑤         |                                                                                    |
|                                                     |                                                                                     |                                                                                      |      |           |                                                                                    |
|                                                    |  |  |      |           |                                                                                    |



| Landscape Conservation Value of Wetland                                 |     |        |      |           |
|-------------------------------------------------------------------------|-----|--------|------|-----------|
| wet and moist land that is always kept hydrated by natural environment. |     |        |      |           |
| Very Low                                                                | Low | Normal | High | Very High |
| ①                                                                       | ②   | ③      | ④    | ⑤         |

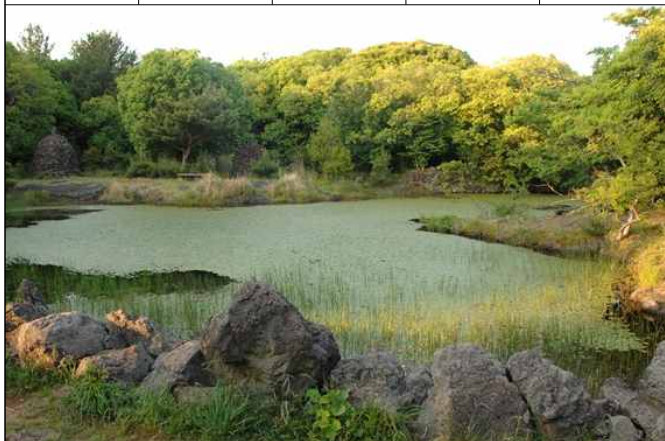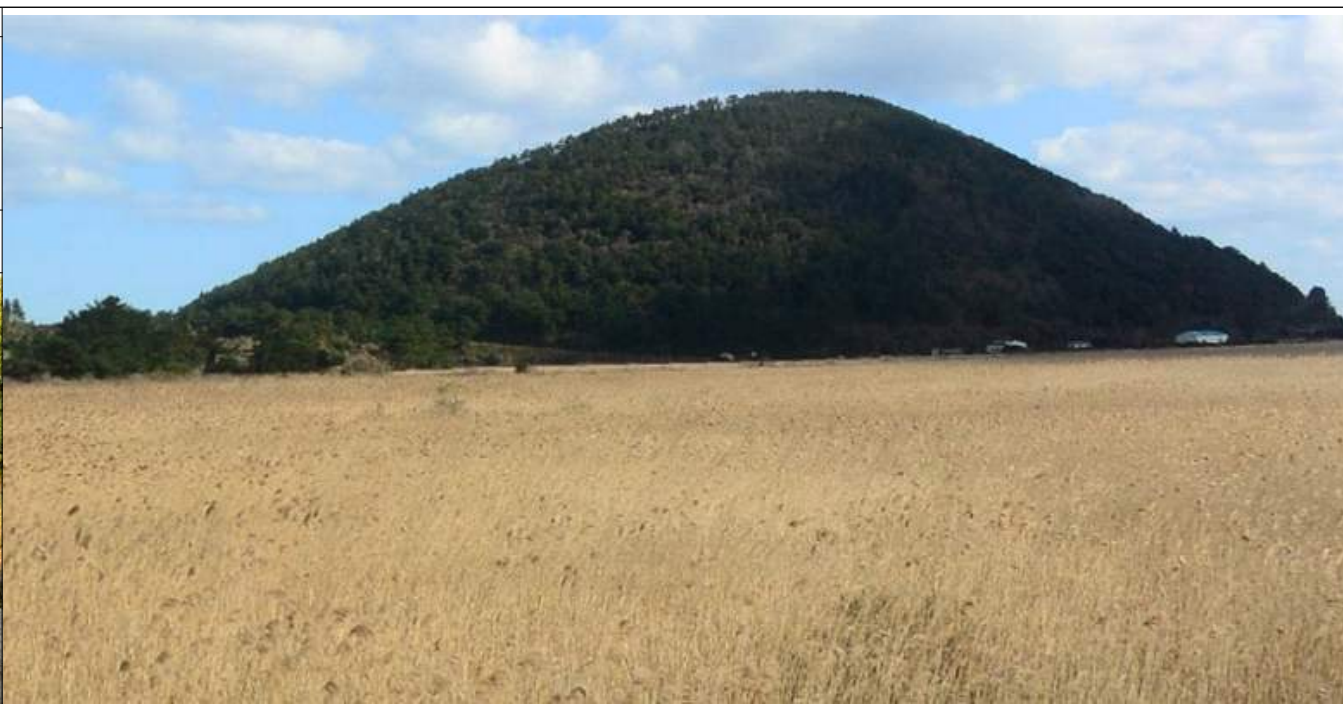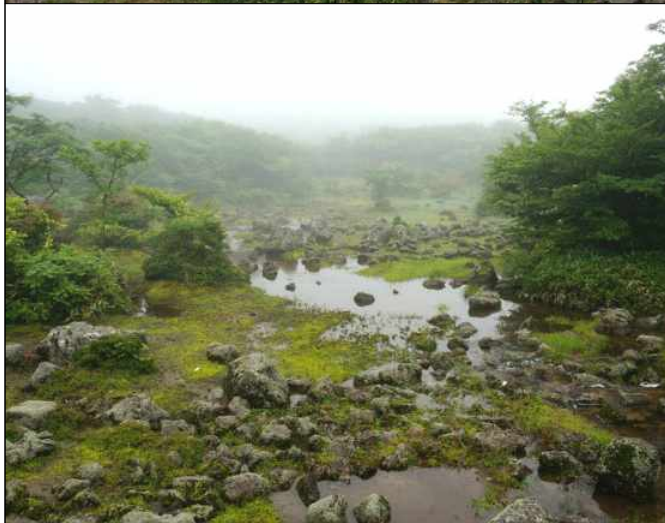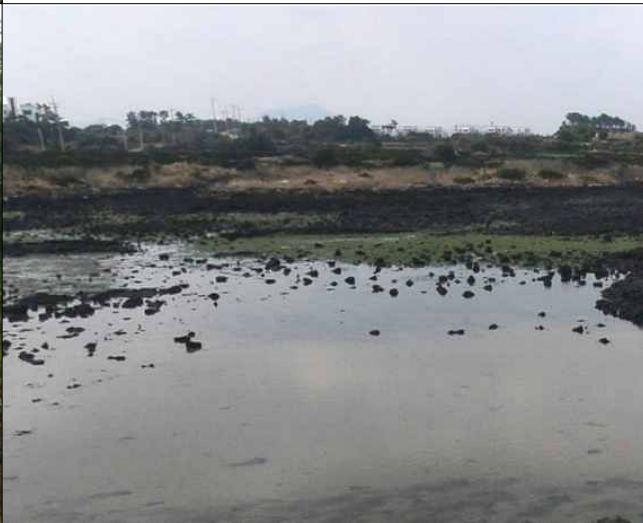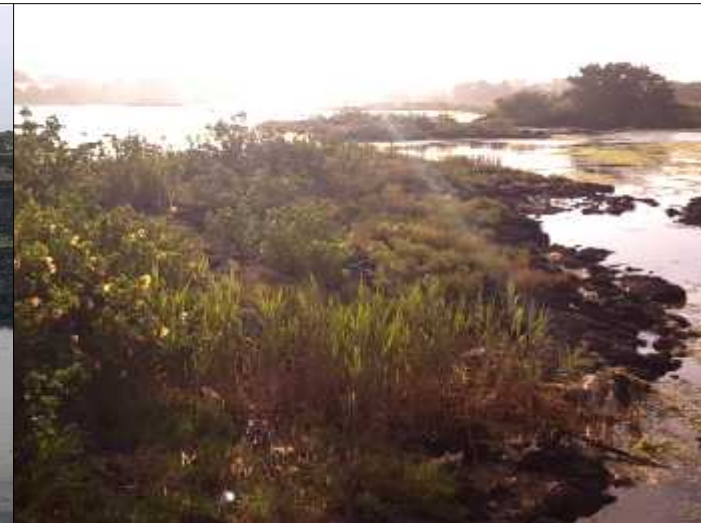



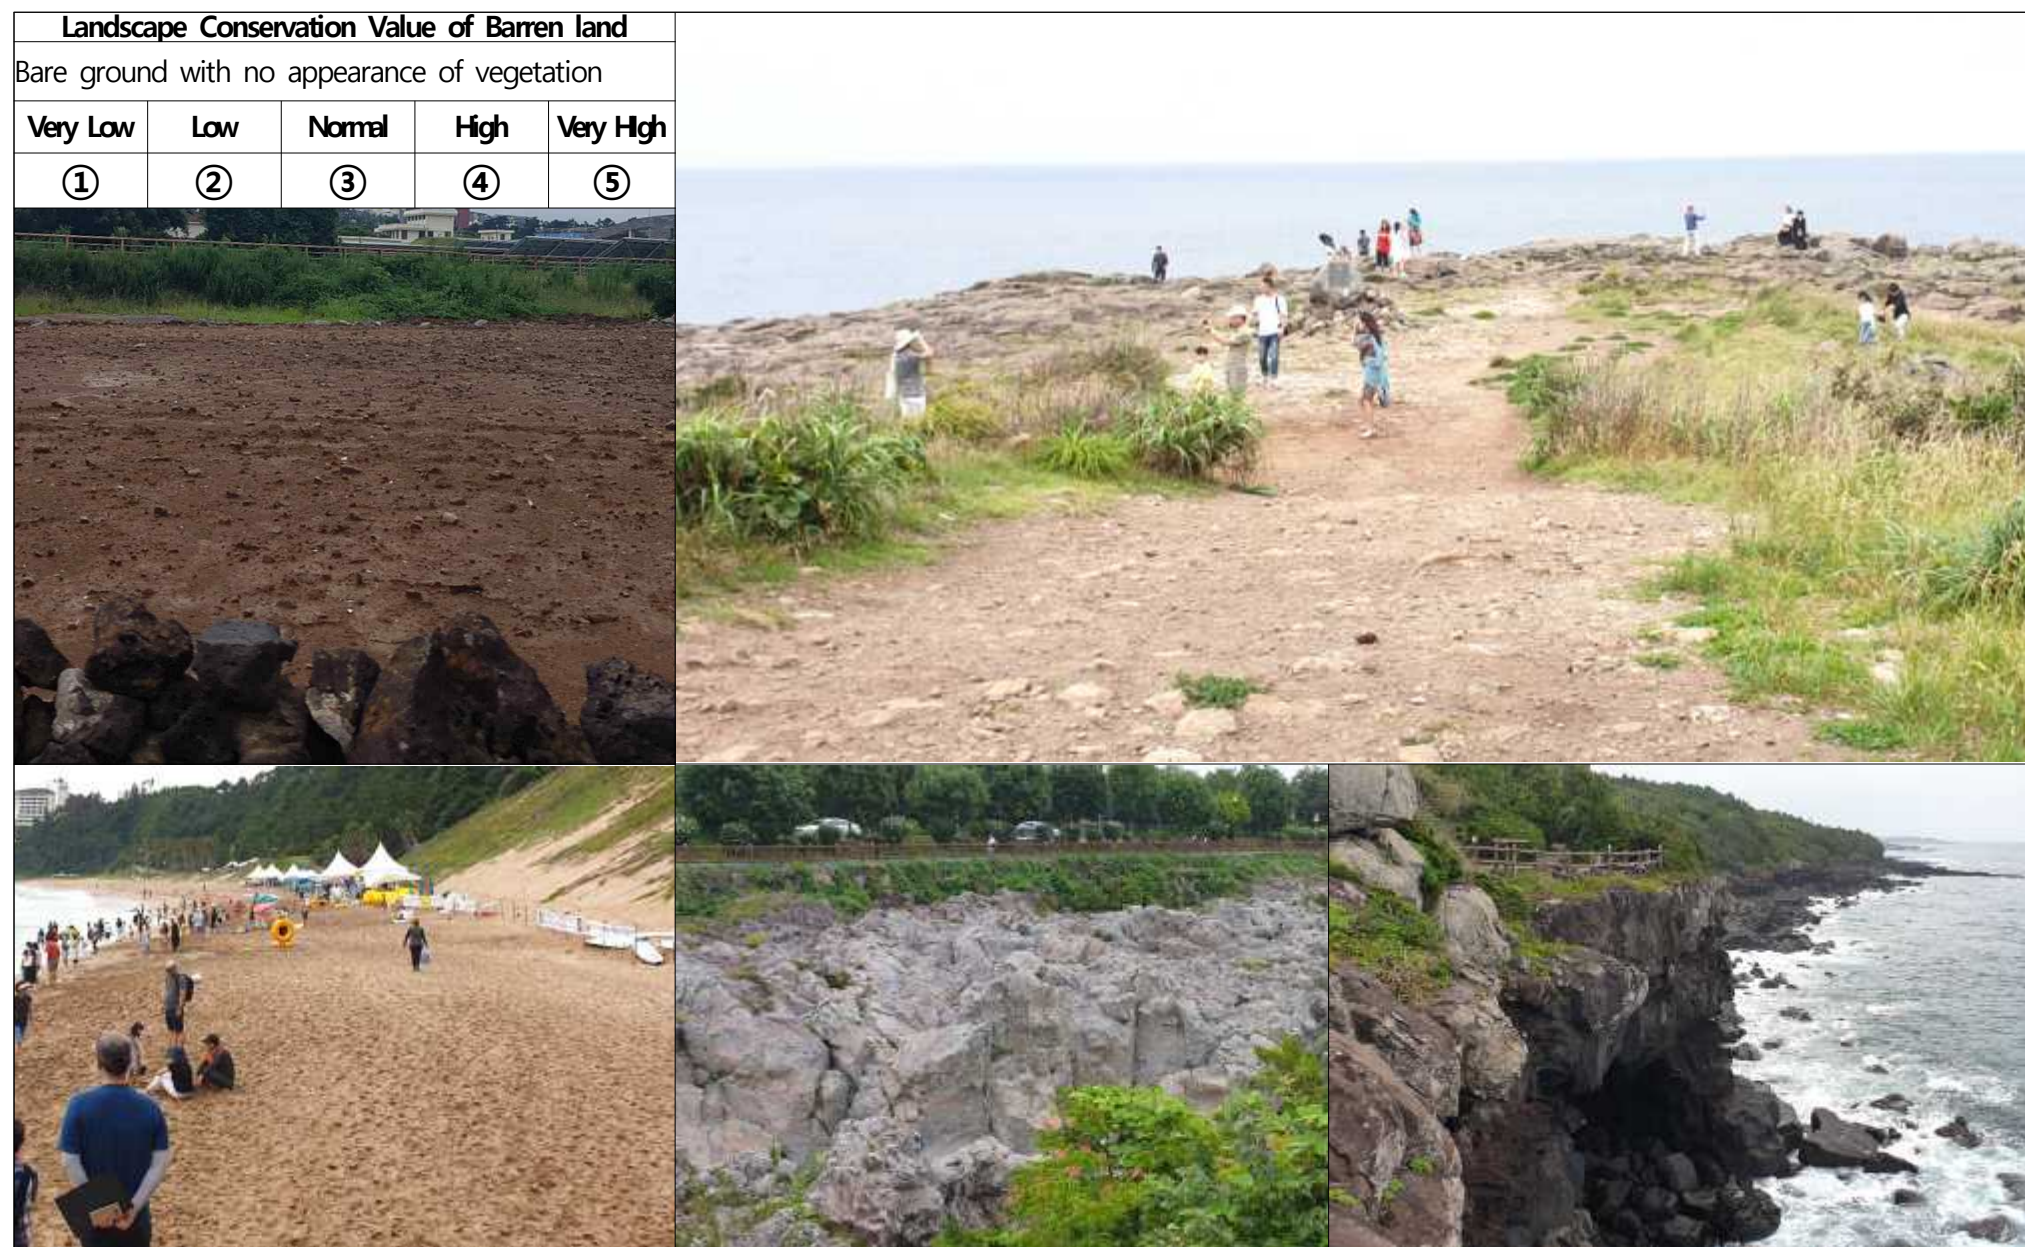



**Landscape Conservation Value of Open water**  
 Low-lying areas of water, such as lakes, reservoirs and swamps.

| Very Low | Low | Normal | High | Very High |
|----------|-----|--------|------|-----------|
| ①        | ②   | ③      | ④    | ⑤         |

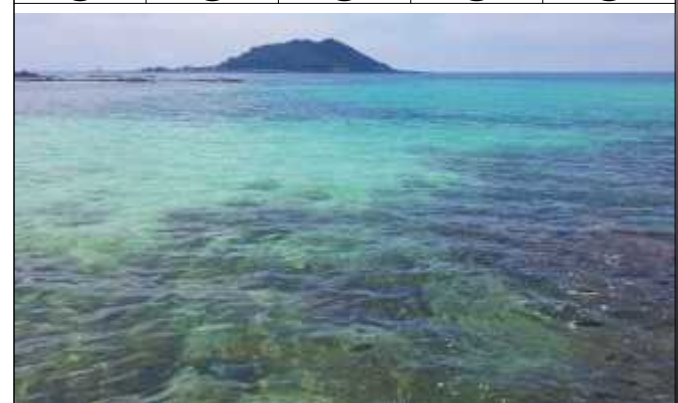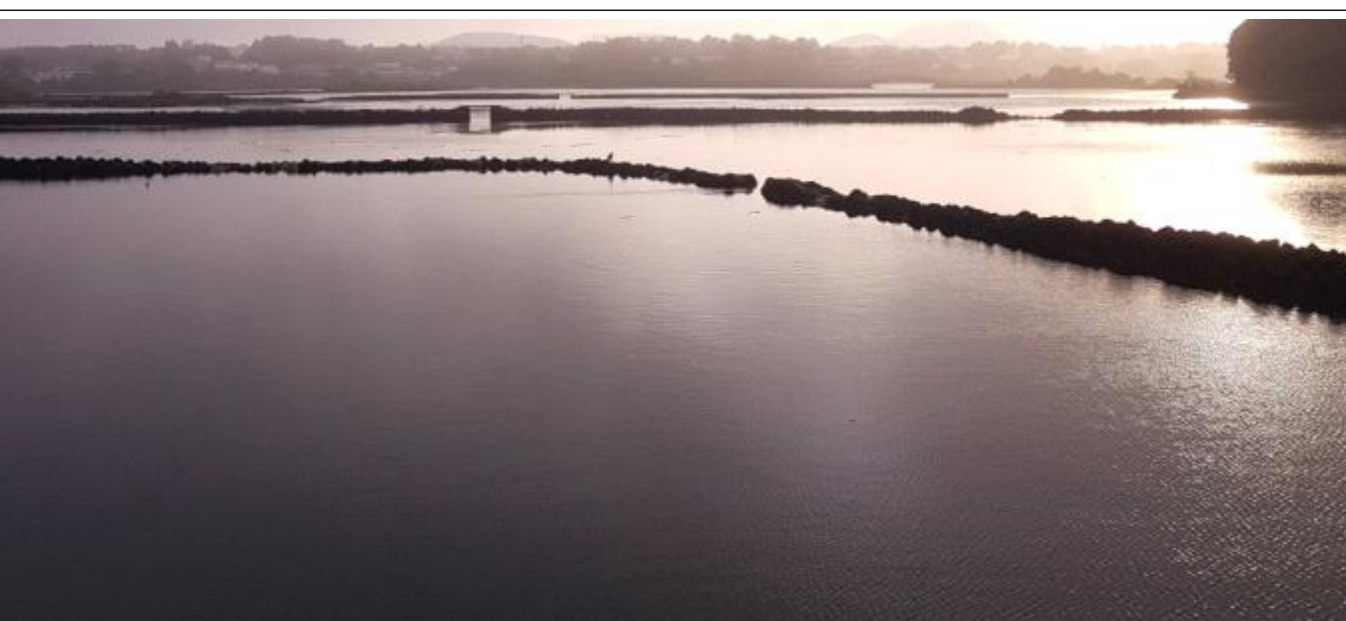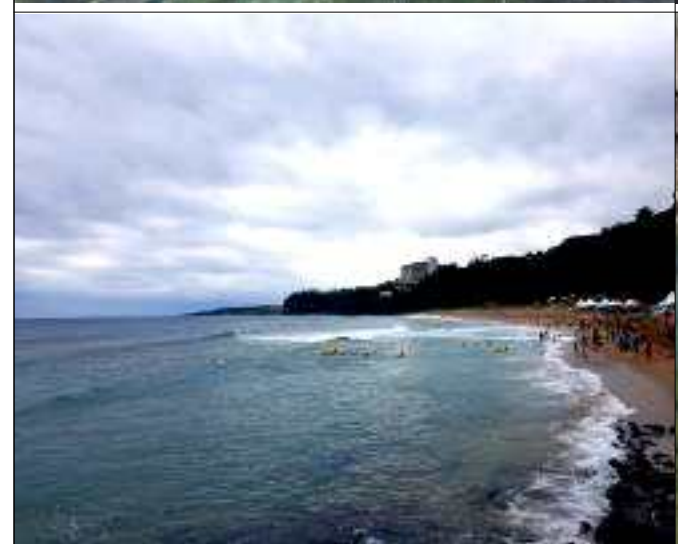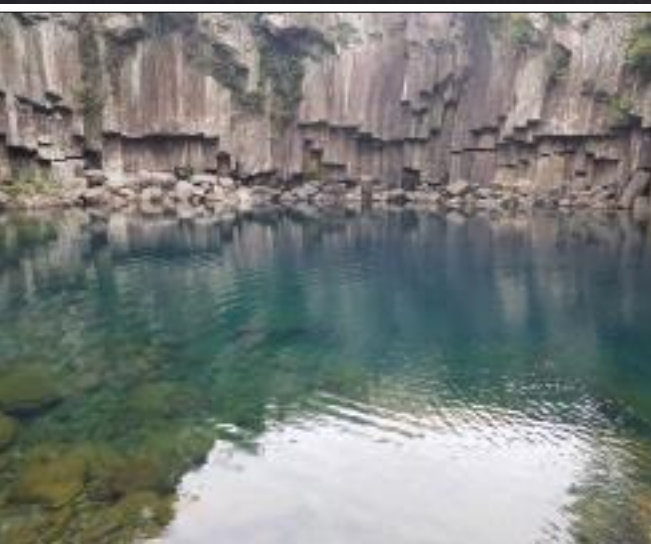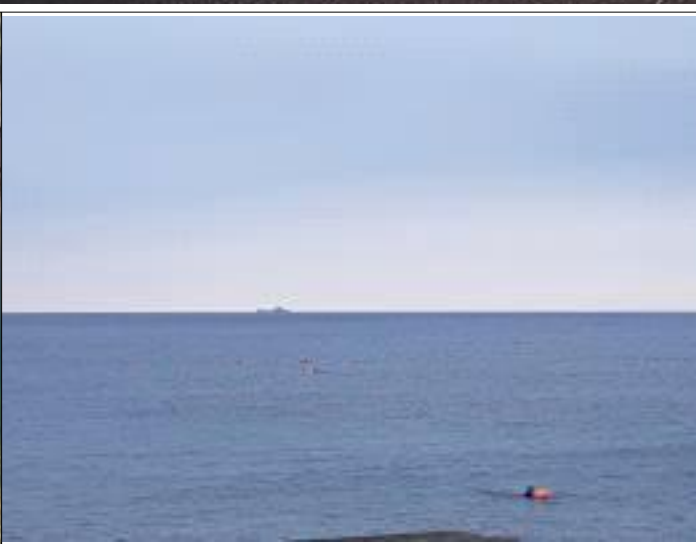



Throughout the survey different types of land cover and landform were evaluated separately. If you were to evaluate the relative importance of the landform and the land cover factors, how would you rate their relative importance? Please check one blank..

| Evaluation<br>Standard<br>A | A is more important |      |                  | Even | B is more important |      |              | Evaluation<br>Standard<br>B |
|-----------------------------|---------------------|------|------------------|------|---------------------|------|--------------|-----------------------------|
|                             | Much<br>More        | More | Slightly<br>More |      | Slightly<br>More    | More | Much<br>More |                             |
| Landform                    |                     |      |                  |      |                     |      |              | Land Cover                  |

## Personal Information

|                       |                                                                                                                                                  |
|-----------------------|--------------------------------------------------------------------------------------------------------------------------------------------------|
| Name                  |                                                                                                                                                  |
| Age                   | 20s <input type="checkbox"/> 30s <input type="checkbox"/> 40s <input type="checkbox"/> 50s <input type="checkbox"/> 60s <input type="checkbox"/> |
| Major                 |                                                                                                                                                  |
| Education             | Bachelor <input type="checkbox"/> Master <input type="checkbox"/> Ph.D <input type="checkbox"/>                                                  |
| W o r k<br>Experience | (     )years                                                                                                                                     |
| Contact               | Affiliation:                                                                                                                                     |
|                       | Address:                                                                                                                                         |
|                       | E-mail address:                                                                                                                                  |

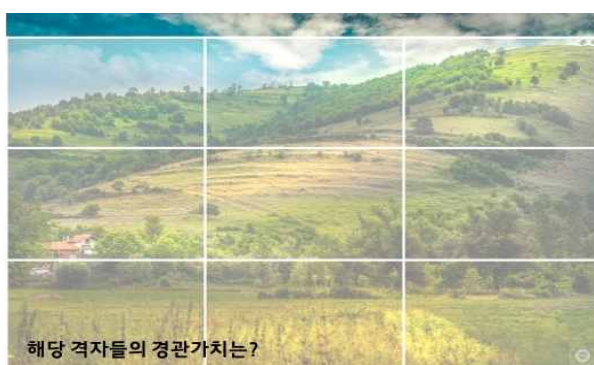

Thank you for your Participation.

This the 1<sup>st</sup> part of the survey and further later you will be asked to participate in

2<sup>nd</sup> part of the survey.

Please send your response to [baysokjun@nie.re.kr](mailto:baysokjun@nie.re.kr) within two to three days.
