# Supplementary material for: Development of landscape conservation value map of Jeju island, Korea for integrative landscape management and planning using conservation value of landscape typology
Source: PeerJ. 2021 Jun 1;9:e11449. doi: 10.7717/peerj.11449 (PMC8176906; doi:10.7717/peerj.11449)
Supplement: Supplemental Information 7 [file peerj-09-11449-s007.xlsx]

## Sheet: Sheet1
	1. As for the 1st survey types of landform and land cover were separately rated from 1 to 5 then the individual weight rated by each participant was applied. 2. The weight was set to be rated as Landform-(very important)-(important)-(slightly important)-(even)-(slightly important)-(important)-(very important)-Land cover 3. Then the values were assigned to each level of important(1.8 for 'Very imp…
Respondent		Landform						Land cover							Weight
No.	Occupation	Summit	Channel	Shoulder	Slope	Flat land	Mild slope 2	Wetland	Open water	Forest	Grassland	Agriculture	Developed	Barren land	Landform	Land Cover
1	Professor	5	4	4	3	4	3	4	4	4	4	3	2	2	1	1.25
2	Researcher	5	5	5	4	4	4	5	5	5	3	3	3	3	1	1
3	Professor	5	4	4	4	4	3	3	4	4	4	3	2	2	1	1.5
4	Professor	5	4	3	2	4	2	5	4	4	3	4	1	1	1.5	1
5	Entrepreneur	5	5	4	3	3	3	4	4	2	4	1	5	2	1	1.5
6	Researcher	5	4	5	4	3	3	4	5	4	4	3	2	2	1	1.75
7	Entrepreneur	5	4	5	4	4	4	5	5	5	5	4	2	3	1	1.25
8	Professor	5	5	4	5	3	4	5	5	4	5	3	1	3	1	1
9	Researcher	5	5	3	4	3	4	5	4	4	5	3	3	3	1	1
10	Researcher	5	5	4	4	3	4	5	5	5	4	4	4	4	1	1
11	Entrepreneur	5	5	5	5	3	4	5	5	4	3	5	5	2	1	1
12	Professor	5	4	4	3	4	2	5	4	5	3	3	3	2	1	1.5
13	Professor	5	4	3	3	3	3	4	4	4	3	3	2	3	1	1
Average		5	4.46154	4.07692	3.69231	3.46154	3.30769	4.53846	4.46154	4.15385	3.84615	3.23077	2.69231	2.46154	1	1.25
σ		0	0.518875	0.759555	0.85485	0.518875	0.751068	0.660225	0.518875	0.800641	0.800641	0.926809	1.31559	0.77625	0.33
1st Survey		Summit							Channel							Shoulder							Slope							Flat land
Respondent		Wetland	Open water	Forest	Grassland	Agriculture	Developed	Barren land	Wetland	Open water	Forest	Grassland	Agriculture	Developed	Barren land	Wetland	Open water	Forest	Grassland	Agriculture	Developed	Barren land	Wetland	Open water	Forest	Grassland	Agriculture	Developed	Barren land	Wetland	Open water	Forest	Grassland	Agriculture	Developed	Barren land
1		10	10	10	10	7	3	3	7	7	7	7	4	1	1	7	7	7	7	4	1	1	4	4	4	4	2	1	1	6	6	6	6	3	1	1
2		10	10	10	3	3	3	3	10	10	10	3	3	3	3	10	10	10	3	3	3	3	7	7	7	1	1	1	1	7	7	7	1	1	1	1
3		7	10	10	10	7	3	3	4	7	7	7	4	1	1	4	7	7	7	4	1	1	4	7	7	7	4	1	1	3	6	6	6	3	1	1
4		10	8	8	6	8	2	2	8	6	6	5	6	1	1	6	5	5	3	5	1	1	4	3	3	2	3	1	1	6	5	5	3	5	1	1
5		8	8	4	8	1	10	4	8	8	4	8	1	10	4	6	6	3	6	1	8	3	5	5	2	5	1	6	2	5	5	2	5	1	6	2
6		8	10	8	8	5	2	2	6	8	6	6	3	1	1	8	10	8	8	5	2	2	6	8	6	6	3	1	1	3	5	8	10	5	2	1
7		10	10	10	10	8	2	5	8	8	8	8	5	1	3	10	10	10	10	8	2	5	8	8	8	8	5	1	3	8	8	8	8	5	1	3
8		10	10	10	10	7	1	7	10	10	10	10	7	1	7	10	10	7	10	4	1	4	10	10	10	10	7	1	7	9	9	6	9	3	1	3
9		10	7	7	10	4	4	4	10	7	7	10	4	4	4	4	2	2	4	1	1	1	7	5	5	7	2	2	2	6	4	4	6	1	1	1
10		10	10	10	6	6	6	6	10	10	10	6	6	6	6	6	6	6	2	2	2	2	6	6	6	2	2	2	2	3	3	10	10	10	6	6
11		10	10	8	5	10	10	2	10	10	8	5	10	10	2	10	10	8	5	10	10	2	10	10	8	5	10	10	2	6	6	4	2	6	6	1
12		10	8	10	5	5	5	3	8	6	8	4	4	4	2	8	6	8	4	4	4	2	5	4	5	2	2	2	1	5	4	5	2	2	2	1
13		10	10	10	8	8	5	8	8	8	8	6	6	4	6	6	6	6	5	5	3	5	6	6	6	5	5	3	5	6	6	6	5	5	3	5
Average		9.46154	9.30769	8.84615	7.61538	6.07692	4.30769	4	8.23077	8.07692	7.61538	6.53846	4.84615	3.61538	3.15385	7.30769	7.30769	6.69231	5.69231	4.30769	3	2.46154	6.30769	6.38462	5.92308	4.92308	3.61538	2.46154	2.23077	5.61538	5.69231	5.92308	5.61538	3.84615	2.46154	2.07692
σ		1.00884	1.06588	1.74736	2.30513	2.33573	2.78415	1.88108	1.76085	1.4391	1.68881	2.02353	2.14283	3.15103	2.03228	2.1262	2.43009	2.2663	2.49259	2.43	2.74563	1.39314	1.97619	2.13175	2.09253	2.58581	2.49734	2.56051	1.76085	1.77757	1.58767	1.97918	2.92308	2.44465	2.02353	1.63902
		1. After calcualting the average of LCV of each landscape types the averages were normalized from 1 to 10 for better understanding
2nd Survey		Summit							Channel							Shoulder							Slope							Flat land
Respondent		Wetland	Open water	Forest	Grassland	Agriculture	Developed	Barren land	Wetland	Open water	Forest	Grassland	Agriculture	Developed	Barren land	Wetland	Open water	Forest	Grassland	Agriculture	Developed	Barren land	Wetland	Open water	Forest	Grassland	Agriculture	Developed	Barren land	Wetland	Open water	Forest	Grassland	Agriculture	Developed	Barren land
1		10	9	9	8	7	3	4	7	8	7	7	5	3	2	8	8	8	7	5	2	2	5	4	4	3	3	2	1	6	6	6	6	3	3	1
2		10	10	10	7	6	3	3	10	10	9	7	3	2	2	10	10	8	4	4	2	2	7	7	7	3	2	1	1	7	7	6	3	2	1	1
3		8	9	10	9	7	3	3	6	7	7	7	4	2	1	6	8	7	6	5	2	1	5	7	6	6	4	1	1	5	6	6	5	3	1	1
4		10	9	9	6	7	2	2	8	6	6	5	6	1	1	7	6	5	3	5	1	1	5	5	3	3	3	1	1	6	5	5	3	5	1	1
5		9	9	6	8	4	3	3	8	8	9	8	5	4	4	8	7	8	6	3	3	3	6	6	5	3	1	1	2	4	4	6	4	2	1	1
6		8	10	8	8	6	2	3	7	8	7	6	4	2	1	7	9	8	8	4	2	3	6	8	7	6	2	1	2	6	6	5	3	2	1	2
7		10	10	10	9	6	2	5	8	8	8	7	4	1	4	7	9	9	8	8	2	4	6	8	7	8	5	1	3	7	6	7	7	5	1	5
8		10	10	9	8	5	2	6	10	10	10	7	5	1	4	9	9	9	9	4	2	6	9	8	8	8	4	1	4	9	8	7	6	3	1	4
9		10	9	7	8	4	3	3	8	8	8	6	4	4	4	5	5	3	5	1	1	1	7	6	5	6	2	2	2	6	5	5	5	1	1	1
10		10	10	10	9	5	3	3	9	9	9	6	4	3	3	6	8	8	5	3	2	2	6	6	5	4	2	2	2	5	5	5	3	2	1	1
11		10	10	10	6	8	8	3	10	9	8	5	6	6	2	9	10	8	5	9	6	2	9	9	8	5	10	9	2	6	6	4	3	5	2	1
12		10	10	10	7	5	5	3	8	7	8	5	4	3	2	8	7	8	5	4	2	2	6	5	6	3	2	1	1	6	6	5	3	2	2	1
13		10	10	10	8	5	3	6	9	8	8	6	6	4	5	8	7	8	6	5	2	3	6	6	6	5	5	2	4	7	6	6	5	5	2	3
Average		9.61538	9.61538	9.07692	7.76923	5.76923	3.23077	3.61538	8.30769	8.15385	8	6.30769	4.61538	2.76923	2.69231	7.53846	7.92308	7.46154	5.92308	4.61538	2.23077	2.46154	6.38462	6.53846	5.92308	4.84615	3.46154	1.92308	2	6.15385	5.84615	5.61538	4.30769	3.07692	1.38462	1.76923
σ		0.767948	0.50637	1.32045	1.01274	1.23517	1.64083	1.26085	1.25064	1.14354	1.08012	0.947331	0.960769	1.48064	1.37747	1.39137	1.49786	1.6641	1.70595	2.06311	1.23517	1.39137	1.3253	1.45002	1.49786	1.86396	2.3315	2.17798	1.08012	1.21423	0.987096	0.869718	1.4367	1.44115	0.650444	1.36344
Normalization		10	10	9.41	7.98	5.79	3.45	3.02	8.57	8.39	8.23	6.38	4.54	2.43	2.52	7.73	8.14	7.64	5.96	4.54	2.18	1.93	6.46	6.64	5.96	4.79	3.27	1.68	1.59	6.21	5.88	5.63	4.2	2.86	1.43	1
